# Supplementary material
Source: Elsevier journal article supplement (https://www.sciencedirect.com/science/article/pii/S225555362030080X)
Supplement: mmc1 [file S225555362030080X:mmc1.doc]

JPED-D-20-00148 – Material Suplementar

#### Tabela S1 - Dados demográficos e características clínicas de pacientes com COVID-19 sem MIS, de acordo com a presença de comorbidades, idade inferior a 1 ano e necessidade de ventilação mecânica invasiva (n = 69)

|  | Comorbidades | | | Idade | | | VMI | | |
| --- | --- | --- | --- | --- | --- | --- | --- | --- | --- |
|  | Sim | Não | *p-*valor | < 1 a | ≥ 1 a | *p-*valor | Sim | Não | *p-*valor |
|  |  |  |  |  |  |  |  |  |  |
| Idade, mediana (IIQ), a | 6,5 (2,1- 12,1) | 1,7 (0,8-7,9) | 0,02c | 0,5 (0,2-0,8) | 6,5 (1,9-12,9) | < 0,001c | 4,2 (1,0-10,5) | 3,9 (1,0-10,3) | 0,93c |
| Sexo |  |  |  |  |  |  |  |  |  |
| Masculino | 15 (50) | 20 (51) | 0,92a | 7 (41) | 28 (54) | 0,36a | 5 (38) | 30 (54) | 0,33a |
| Feminino | 15 (50) | 19 (49) |  | 10 (59) | 24 (46) |  | 8 (62) | 26 (46) |  |
| Etnia |  |  |  |  |  |  |  |  |  |
| Branca | 16 (53) | 24 (62) | 0,49a | 7 (41) | 33 (63) | 0,11a | 8 (62) | 32 (57) | 0,77a |
| Não-branca | 14 (47) | 15 (38) |  | 10 (59) | 19 (37) |  | 5 (38) | 24 (43) |  |
| Comorbidades |  |  |  |  |  |  |  |  |  |
| Sim | - | - | - | 5 (29) | 25 (48) | 0,18a | 10 (77) | 20 (36) | 0,01a |
| Não | - | - |  | 12 (71) | 27 (52) |  | 3 (23) | 36 (64) |  |
| Síndrome clínica principal na apresentação |  |  |  |  |  |  |  |  |  |
| Respiratória | 22 (73) | 24 (62) | 0,37a | 12 (75) | 34 (65) | 0,47a | 11 (85) | 35 (64) | 0,20a |
| Outra | 8 (27) | 15 (38) | 0,37a | 4 (25) | 18 (35) | 0,47a | 2 (15) | 20 (36) | 0,20a |
| Manejo |  |  |  |  |  |  |  |  |  |
| Apenas oxigenoterapia | 17 (57) | 11 (28) | 0,02a | 4 (24) | 24 (46) | 0,10a | 7 (54) | 21 (38) | 0,28a |
| Apenas VNI | 3 (10) | 1 (3) | 0,31a | 1 (6) | 3 (6) | 1a | 2 (15) | 2 (4) | 0,16a |
| VMI | 10 (33) | 3 (8) | 0,01a | 3 (18) | 10 (19) | 1a | 13 (100) | 0 (0) | < 0,001a |
| Duração da VMI, dias, mediana (IIQ) | 7,5 (5,5-9) | 12,5 (4,75- 20) | 0,52 | 9 (9-9) | 7,5 (5,5-12) | 0,48 | 8,0 (6- 11) | - |  |
| Diagnóstico de SDRA | 8 (27) | 1 (3) | 0,01b | 1 (6) | 8 (15) | 0,44b | 9 (69) | 0 (0) | < 0,001b |
| TP UTIP, dias,  mediana (IIQ) | 5,5 (3-10) | 4,5 (2,2- 7,8) | 0,70c | 7,0 (4-12) | 4,0 (2-9) | 0,05a | 12,0 (5- 19) | 4,0 (2,5- 7) | 0,02a |
| Desfecho |  |  |  |  |  |  |  |  |  |
| Alta | 25 (83) | 37 (95) | 0,25b | 15 (88) | 47 (90) | 0,77b | 9 (69) | 53 (95) | 0,01b |
| Morte | 2 (7) | 0 (0) |  | 0 (0) | 2 (4) |  | 2 (15) | 0 (0) |  |
| Transferência para outro hospital | 3 (10) | 2 (5) |  | 2 (12) | 3 (6) |  | 2 (15) | 3 (5) |  |

SDRA, Síndrome do Desconforto Respiratório Agudo; IIQ, intervalo interquartil; VMI, ventilação mecânica invasiva; TP, Tempo de permanência; MIS, síndrome inflamatória multissistêmica; VNI, ventilação não invasiva; UTIP, Unidade de Terapia Intensiva Pediátrica.

a Qui-quadrado.

b Exato de Fisher.

c Mann-Whitney.

**Tabela S2 - *Odds ratio* não-ajustados e ajustados e intervalos de confiança de 95% para pacientes pediátricos com COVID**-19, sem MIS, de acordo com a necessidade de ventilação mecânica invasiva (n = 69)

|  | Ventilação Mecânica Invasiva | | | |
| --- | --- | --- | --- | --- |
|  | *OR* bruto (95% CI) | *p*-valor | *OR* ajustado (IC95%) | *p-*valor  (teste de Wald) |
| Idade < 1a | 1,00 (0,99-1,01) | 0,75 | 0,99 (0,98-1,00) | 0,60 |
| Sexo, Masculino | 0,54 (0,16-1,86) | 0,33 | 0,44 (0,11-1,74) | 0,24 |
| Etnia, não-branca | 0,83 (0,24-2,87) | 0,77 | 0,6 (0,15-2,36) | 0,46 |
| Comorbidades | 6 (1,48-24,36) | 0,01 | 7,3 (1,63-32,7) | 0,01 |

OR, *odds ratio*; IC, intervalo de confiança; UTIP, Unidade de Terapia Intensiva Pediátrica; MIS, Síndrome Inflamatória Multissistêmica.

a Ajustado para idade < 1 ano, etnia, sexo e presença de comorbidades.
